# Supplementary material for: Impact of Intercurrent Introduction of Steroids on Clinical Outcomes in Advanced Non-Small-Cell Lung Cancer (NSCLC) Patients under Immune-Checkpoint Inhibitors (ICI)
Source: MDPI journal article supplement (doi:10.3390/cancers12102827), 2020-09-30

# Supplementary Materials: Impact of Intercurrent Introduction of Steroids on Clinical Outcomes in Advanced Non-Small-Cell Lung Cancer (NSCLC) Patients under Immune-Checkpoint Inhibitors (ICI)

Andrea De Giglio, Laura Mezquita, Edouard Auclin, Félix Blanc-Durand, Mariona Riudavets, Caroline Caramella, Gala Martinez, Jose Carlos Benitez, Patricia Martín-Romano, Lamiae El-Amarti, Lizza Hendriks, Roberto Ferrara, Charles Naltet, Pernelle Lavaud, Anas Gazzah, Julien Adam, David Planchard, Nathalie Chaput and Benjamin Besse

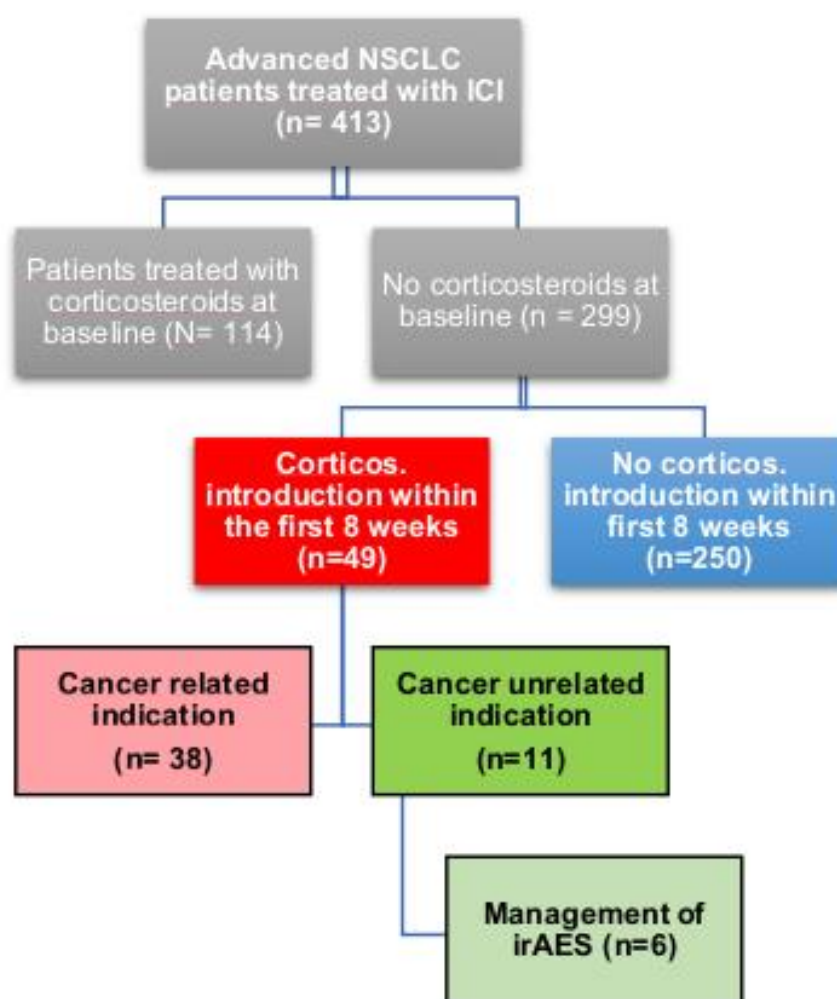

Figure S1: Flowchart of the study.

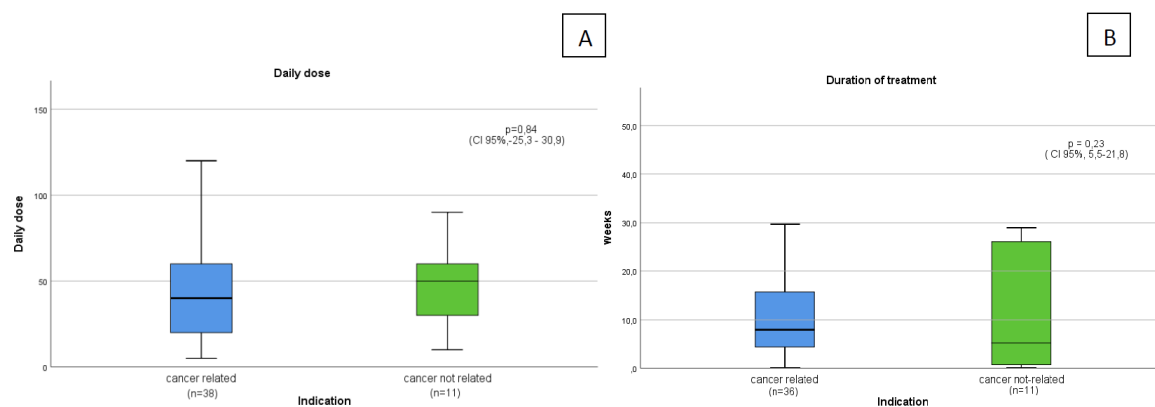

**Figure S2.** Box and whiskers plot describing daily dose (A) and duration of steroid treatment (B) per indication.

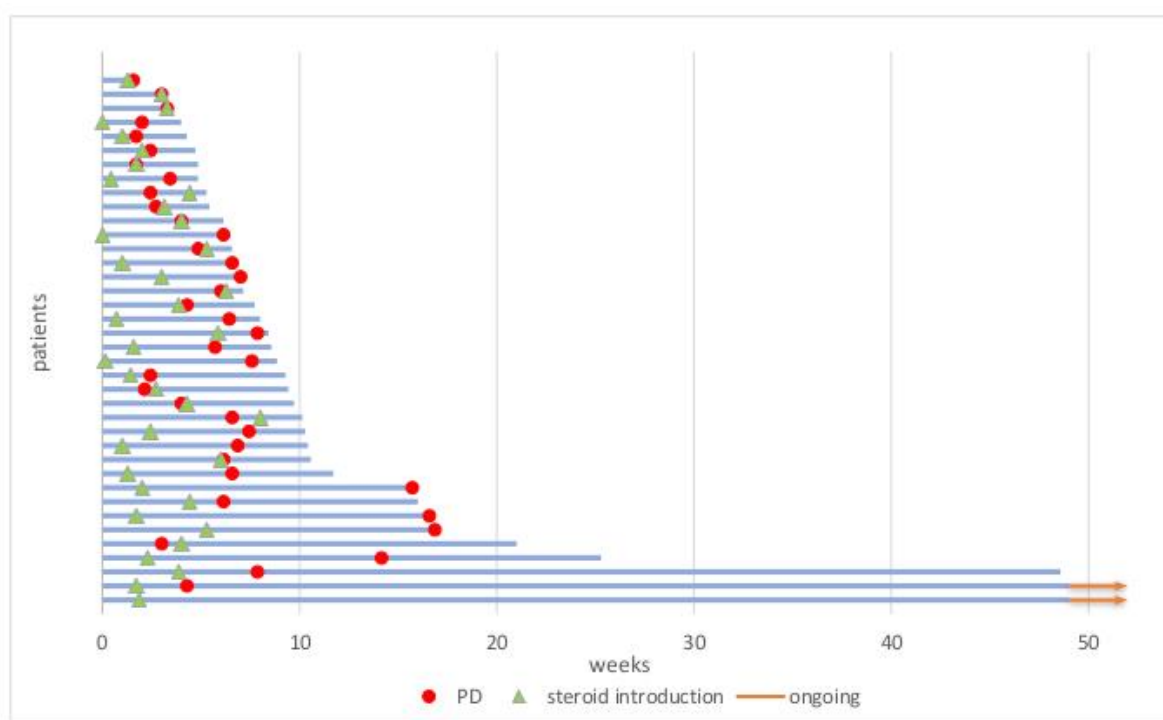

**Figure S3:** Swimmers plot detailing progression survival (PFS) and overall survival (OS) after 1 year of follow-up of patients receiving intercurrent steroids for cancer-related indications.

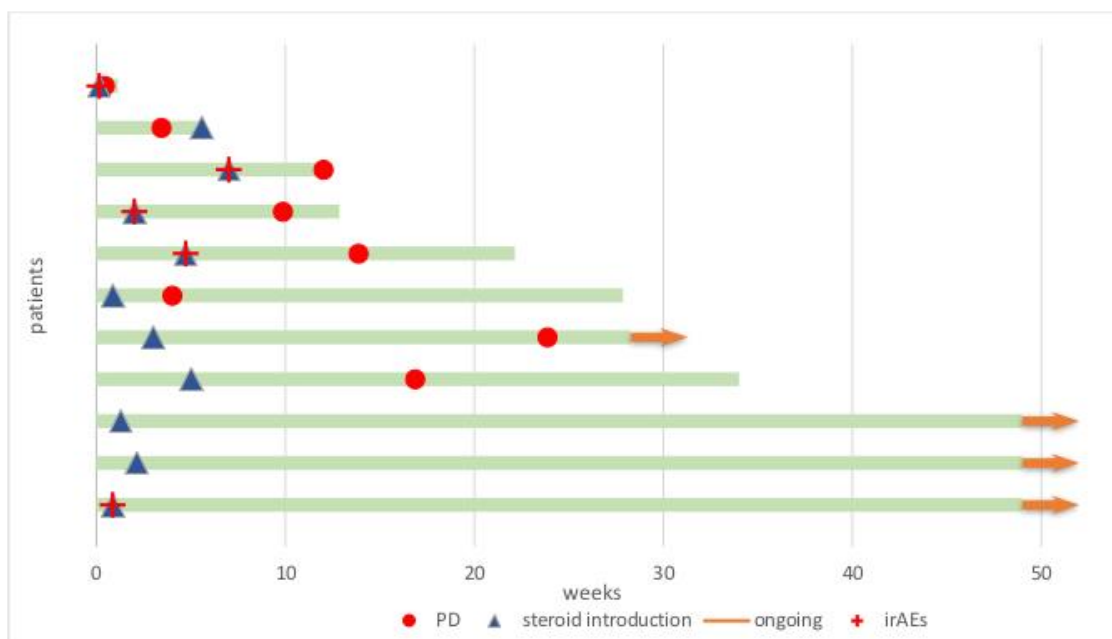

**Figure S4:** Swimmers plot detailing progression survival (PFS) and overall survival (OS) after 1 year of follow-up of patients receiving intercurrent steroids for cancer-unrelated indications.

**Table S1:** Cancer-related indications for corticosteroids administrations are listed with cumulative dosages.

| <b>Cancer-related indication</b>   | <b>Number of patients</b> | <b>%</b> |
|------------------------------------|---------------------------|----------|
| <b>dyspnea cancer related</b>      | 19                        | 50       |
| <b>brain metastasis</b>            | 6                         | 15.8     |
| <b>tumor pain</b>                  | 3                         | 7.9      |
| <b>sup. vena cava syndrome</b>     | 3                         | 7.9      |
| <b>Fatigue</b>                     | 2                         | 5.3      |
| <b>Spinal compression</b>          | 2                         | 5.3      |
| <b>malignant pericarditis</b>      | 1                         | 2.6      |
| <b>Emesis/cholestasis/dysphagy</b> | 1                         | 2.6      |
| <b>oncologic fever</b>             | 1                         | 2.6      |
| <b>Overall</b>                     | 38                        | 100      |

Cancer-related indications for steroids administrations are listed with cumulative dosages.

Table S2: Non-cancer-related indications.

| Non cancer-related indication   | Number of patients | %          |
|---------------------------------|--------------------|------------|
| Pneumonia/COPD exac.            | 3                  | 27.2       |
| Pneumonitis ir                  | 3                  | 27.2       |
| Arthritis ir                    | 2                  | 18.3       |
| Liver failure ir                | 1                  | 9.1        |
| Infusion reaction               | 1                  | 9.1        |
| Premedication for cementoplasty | 1                  | 9.1        |
| <b>Overall</b>                  | <b>11</b>          | <b>100</b> |

Non-cancer-related indications for steroids administrations are listed with cumulative dosages. Abbreviation: COPD, chronic obstructive pulmonary disease.

Table S3. Baseline Characteristics of study population according to antibiotic prescription.

|                                                    |                       | Whole sample<br>(N=413) | antibiotic<br>no<br>(N=265) | antibiotic<br>yes<br>(N=148) | p-value |
|----------------------------------------------------|-----------------------|-------------------------|-----------------------------|------------------------------|---------|
| <b>Steroid group</b>                               | baseline steroids     | 114 (28%)               | 62 (23%)                    | 52 (35%)                     | 0.002   |
|                                                    | intercurrent steroids | 49 (12%)                | 26 (10%)                    | 23 (16%)                     |         |
| <b>Reason of<br/>intercurrent<br/>prescription</b> | no steroids           | 250 (60%)               | 177 (67%)                   | 73 (49%)                     | 0.039   |
|                                                    | non-cancer related    | 11 (4%)                 | 5 (3%)                      | 6 (6%)                       |         |
|                                                    | cancer related        | 38 (13%)                | 21 (10%)                    | 17 (18%)                     |         |
| <b>ECOG PS</b>                                     | NA                    | 114                     | 62                          | 52                           | <0.001  |
|                                                    | 0-1                   | 313 (77%)               | 221 (84%)                   | 92 (64%)                     |         |
|                                                    | ≥ 2                   | 95 (23%)                | 43 (16%)                    | 52 (36%)                     |         |
|                                                    | NA                    | 5                       | 1                           | 4                            |         |

Abbreviation: ECOG PS, Eastern Cooperative Oncology Group performance status

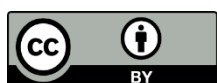

Supplement: s1 [file s1]
